# Supplementary material for: Size-controlled synthesis of metal–organic frameworks and their performance as fluorescence sensors
Source: Royal Society of Chemistry journal article supplement (doi:10.1039/d0an01566k), 2020-01-01
Supplement: d0an01566k1.pdf [file d0an01566k1.pdf]

## Supporting Information for

### **Size-controlled synthesis of lanthanide-organic frameworks and their performance as fluorescence sensors**

Kui Ren<sup>†</sup>, Xiao-Feng Guo<sup>†</sup>, Ying-jie Tang, Bo-Hui Huang, Hong Wang\*

Key Laboratory of Analytical Chemistry for Biology and Medicine (Ministry of Education), College of Chemistry and Molecular Sciences, Wuhan University, Wuhan 430072, China<sup>1</sup>

**Corresponding author:** Hong Wang

E-mail address: hongwang@whu.edu.cn

Tel.: +86-27-87218924; fax: +86-27-68754067

## Table of Contents

|                                                                                                                                                                         |    |
|-------------------------------------------------------------------------------------------------------------------------------------------------------------------------|----|
| Table of Contents.....                                                                                                                                                  | 2  |
| Figure S1. View of the space group of Tb-BTC-MOF along the c-axis, exhibiting 1D helical channels of about 6-7 Å .....                                                  | 4  |
| Figure S2. PXRD patterns of synthesized Tb-MOF-F and simulated from monoclinic (CCDC1499450 ) and tetragonal ((Inorg. Chem. 2010, 49, 10001-10006 ) ) crystal data..... | 5  |
| Figure S3. TGA trace of Tb-MOFs with a heating rate of 5°C per minute measured in nitrogen.....                                                                         | 6  |
| Figure S4. The IR spectra of H <sub>3</sub> BTC ligand and Tb-MOFs.....                                                                                                 | 7  |
| Figure S5. SEM images for Tb-MOF-B with a width about 2.3 μm.....                                                                                                       | 8  |
| Figure S6. SEM images for Tb-MOF-C with a width from 600 nm to 997 nm.....                                                                                              | 9  |
| Figure S7. SEM images for Tb-MOF-E with a width about 162 nm and height of 76 nm.....                                                                                   | 10 |
| Figure S8. Time-dependent fluorescent intensity changes of Bulk-Tb-MOFs and Nano-Tb-MOFs towards Folic acid (40μM).....                                                 | 11 |

### **Calculation of Limit of Detection.**

For calculating the limit of detection, FA (0-30  $\mu\text{M}$ ) was added to Tb-MOFs in ethanol-HEPES buffer (2:3, v/v) (20mM) (6:4, v/v) solution and fluorescent intensity was recorded and a good linear relationship between the fluorescence intensity and concentrations of FA was obtained with slope (K) of  $4374.8 \times 10^6$ . Standard deviation ( $\sigma$ ) was calculated from 10 replicate of Tb-MOFs samples. S is the slope of the calibration curve. Limit of detection was calculated according to the formula:  $\text{LOD} = 3\sigma/K$ .

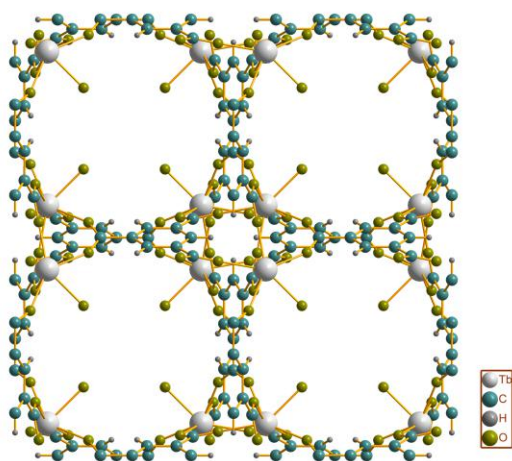

**Figure S1.** View of the space group of Tb-BTC-MOF along the c-axis, exhibiting 1D helical channels of about 6-7 Å .

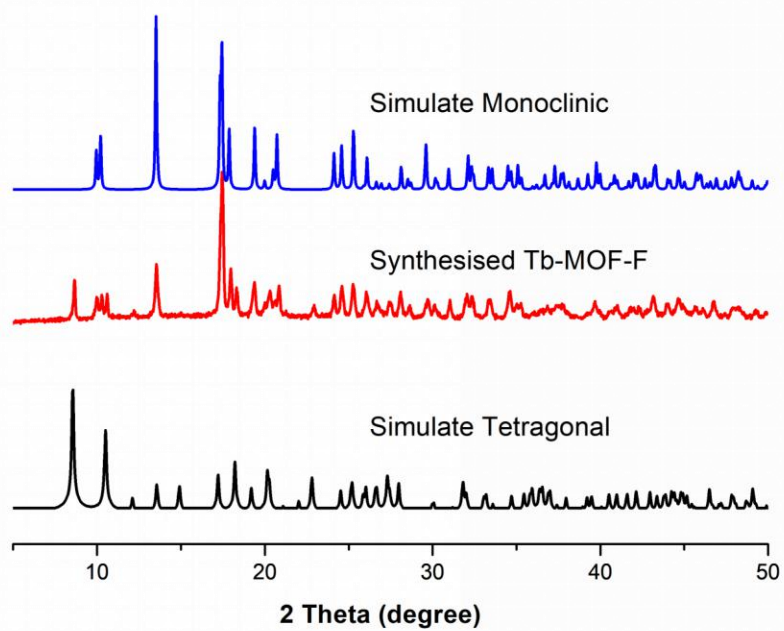

**Figure S2.** PXRD patterns of synthesized Tb-MOF-F and simulated from monoclinic (CCDC1499450) and tetragonal ((Inorg. Chem. 2010, 49, 10001-10006)) crystal data.

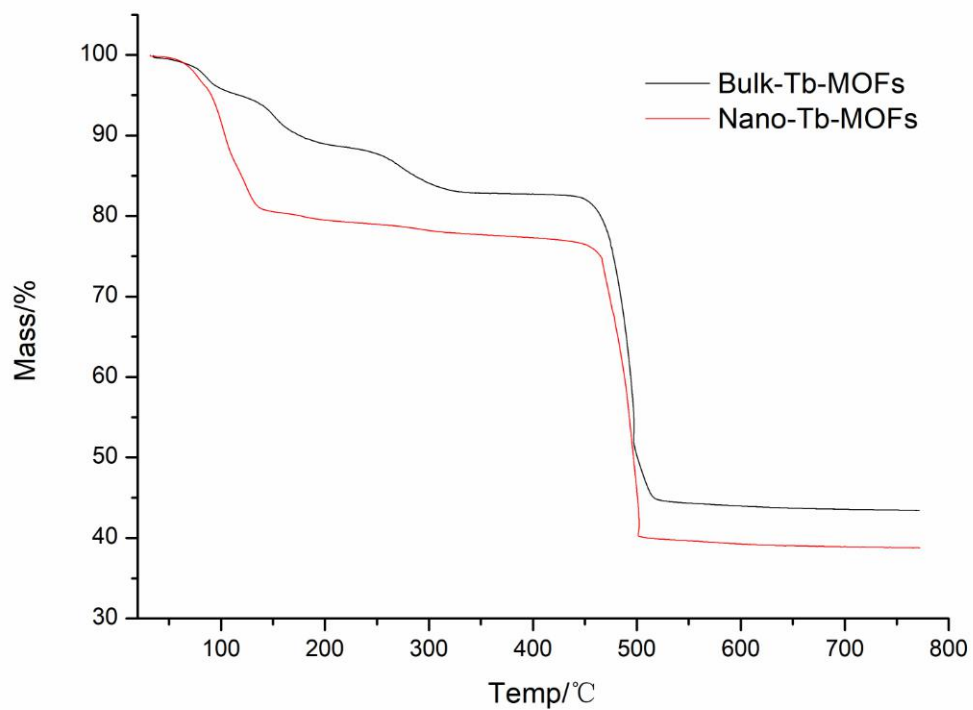

**Figure S3.** TGA trace of Tb-MOFs with a heating rate of 5 °C per minute measured in nitrogen.

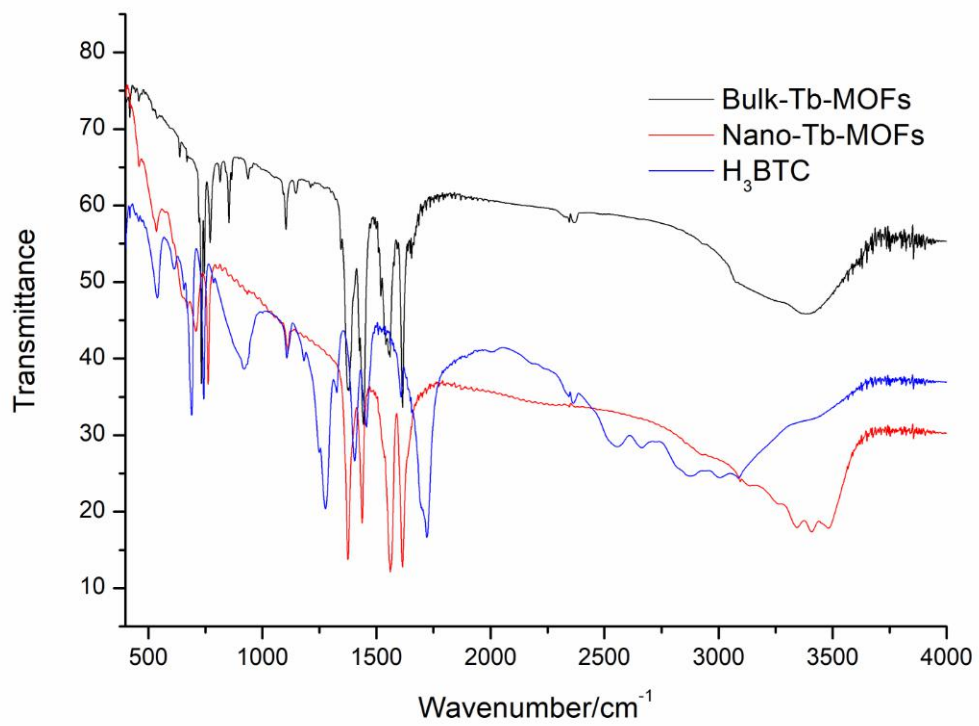

**Figure S4.** The IR spectra of H<sub>3</sub>BTC ligand and Tb-MOFs.

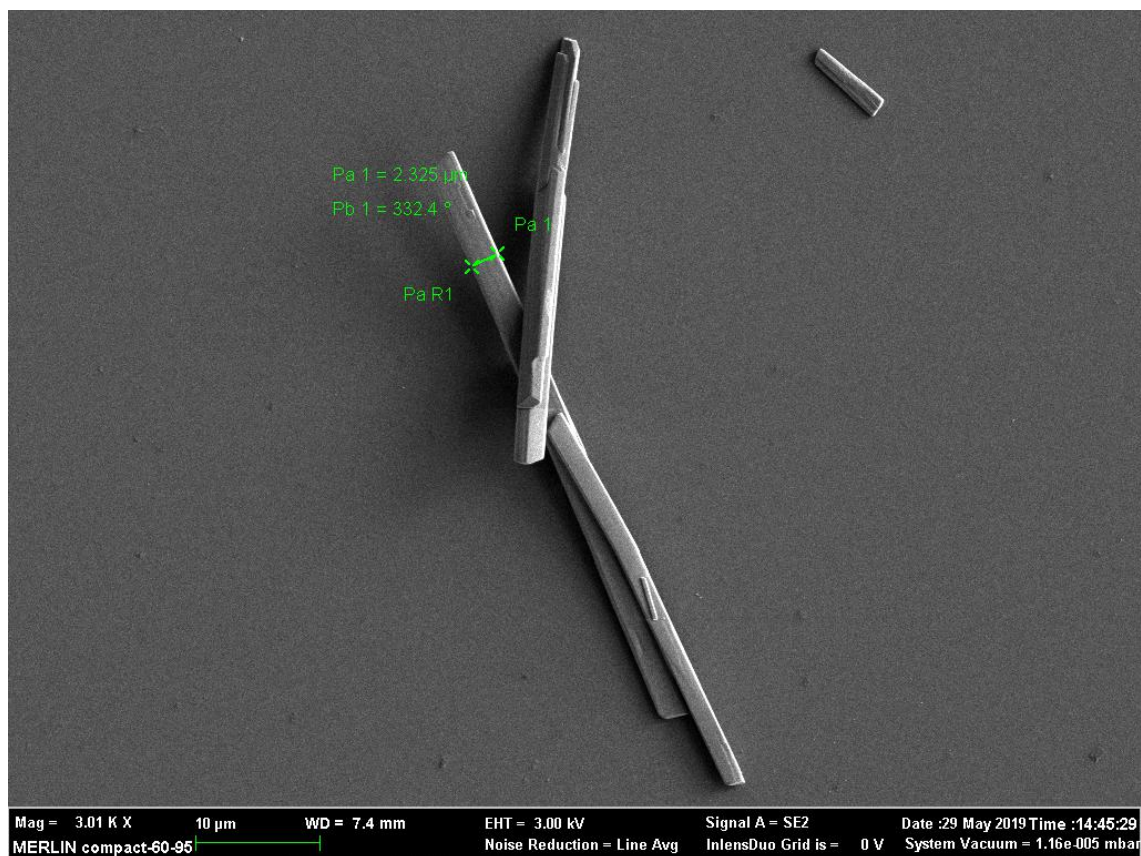

**Figure S5.** SEM images for Tb-MOF-B with a width about 2.3  $\mu\text{m}$ .



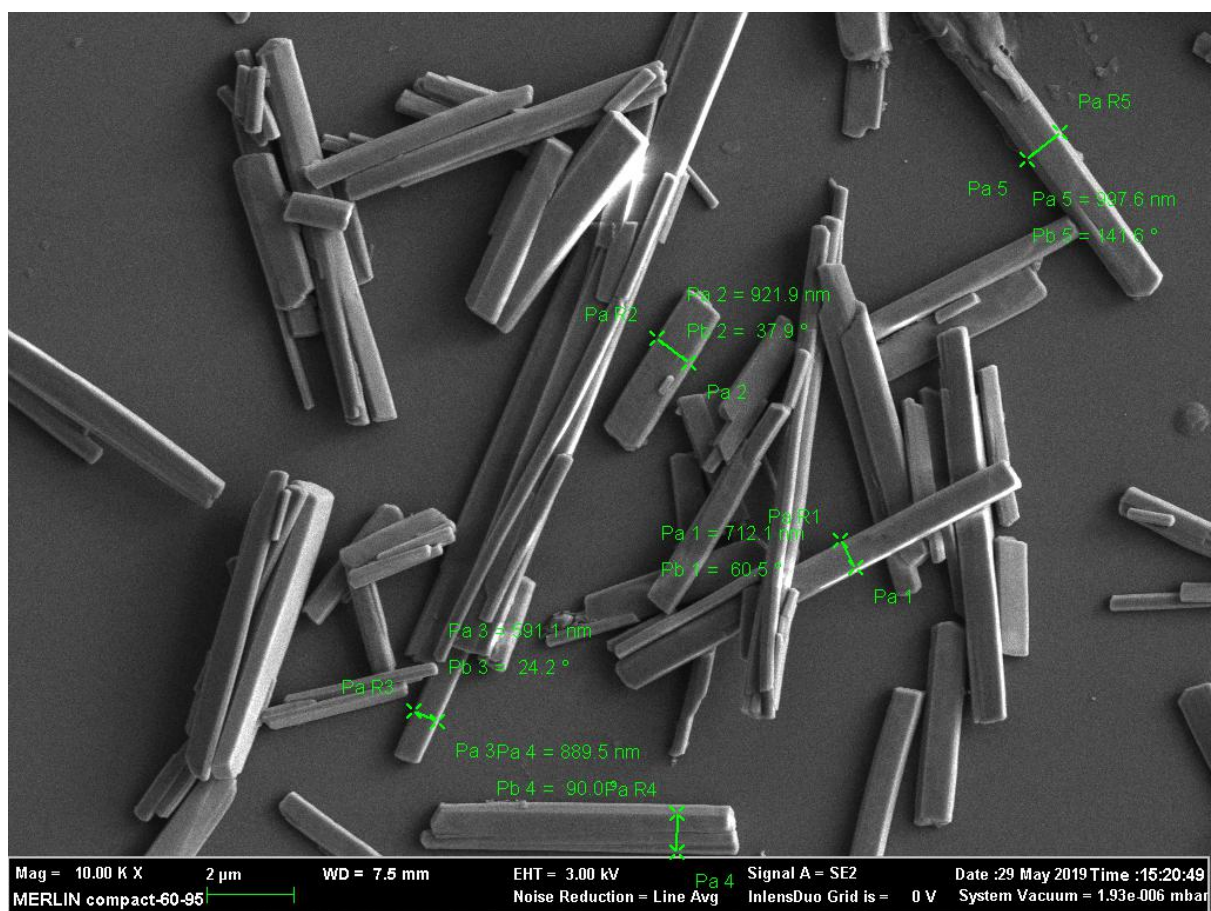

**Figure S6.** SEM images for Tb-MOF-C with a width from 600 nm to 997 nm

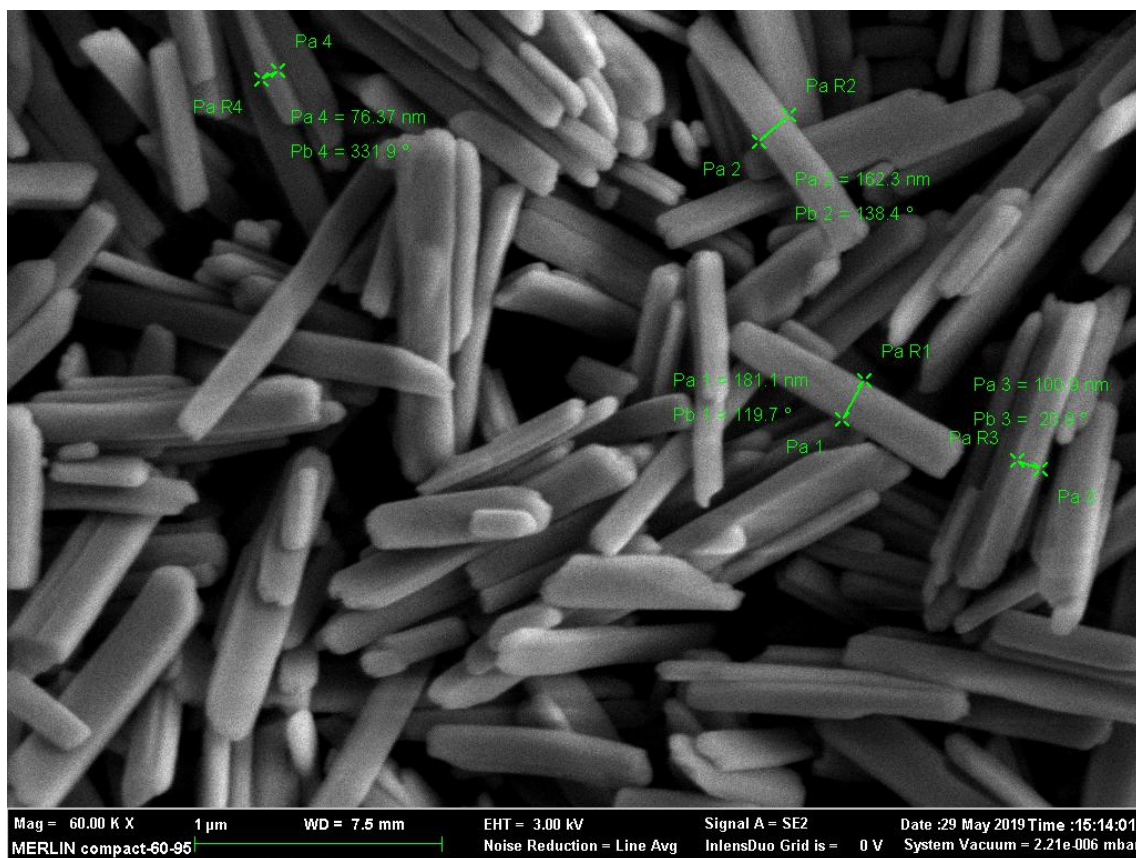

**Figure S7.** SEM images for Tb-MOF-E with a width about 162 nm and height of 76 nm.

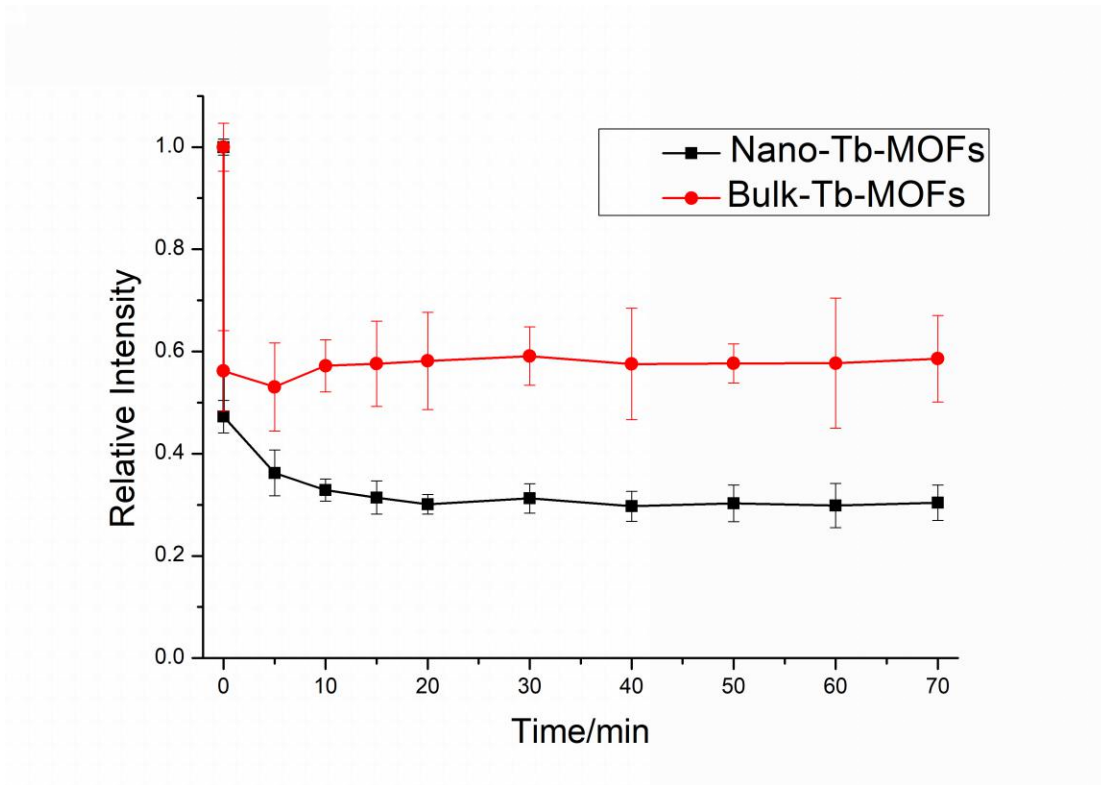

**Figure S8.** Time-dependent fluorescent intensity changes of Bulk-Tb-MOFs and Nano-Tb-MOFs towards Folic acid (40 $\mu$ M).
